# Supplementary material for: Combinations of Single Chain Variable Fragments From HIV Broadly Neutralizing Antibodies Demonstrate High Potency and Breadth
Source: PubMed Central journal article supplement (PMC8481832; doi:10.3389/fimmu.2021.734110), 2021-09-16
Supplement: DataSheet_1.pdf [file DataSheet_1.pdf]

Supplementary Figure 1

**A**

| Pseudovirus           | single scFv IC <sub>50</sub> in nM |            |             |             |              |
|-----------------------|------------------------------------|------------|-------------|-------------|--------------|
|                       | CAP256.25                          | PGT121     | 3BNC117     | 10E8v4      | 8ANC195      |
| Q23.17                | 9.66                               | 0.19       | 1.5         | 14.4        | 249.9        |
| Q168.A2               | 34.93                              | >1595      | 1.1         | 17.3        | 22.9         |
| Q259.D2.17            | 22.33                              | 34.60      | >1595       | 35.7        | >1595        |
| Q461.E2               | 28.71                              | >1595      | 1.8         | 17.3        | 276.2        |
| Q769.D22              | >1595                              | >1595      | 0.5         | 5.5         | 11.5         |
| Q842.D12              | 116.74                             | 2.00       | 0.4         | 18.6        | 1069.1       |
| BG505.W6M 332N        | 4.54                               | 0.56       | 0.6         | 3.4         | 9.1          |
| CAAN5342.A2           | >1595                              | 2.29       | 22.7        | 29.3        | >1595        |
| AC10.0.29             | 233.03                             | 1.46       | >1595       | 3.5         | 62.7         |
| RHPA4259.7            | >1595                              | 0.44       | 0.6         | 12.0        | 8.7          |
| TRO.11                | >1595                              | 2.23       | 1.6         | 8.9         | 7.0          |
| PVO.4                 | 26.55                              | 5.34       | 1.5         | 22.3        | 66.4         |
| SC422661.8            | >1595                              | 105.45     | 3.5         | 1.7         | 115.8        |
| REJO.67               | >1595                              | >1595      | 9.3         | 4.5         | 39.1         |
| TRJO4551.18           | >1595                              | 830.45     | 91.5        | 13.2        | 491.4        |
| WITO.33               | >1595                              | >1595      | 0.9         | 4.4         | >1595        |
| THRO4156.18           | >1595                              | >1595      | 70.3        | 4.2         | >1595        |
| QH0692.42             | >1595                              | >1595      | 3.6         | 12.0        | 233.9        |
| 6535.3                | >1595                              | 0.12       | 188.0       | 5.6         | 19.4         |
| Du151.2               | 1.10                               | 0.17       | 1053.7      | 9.0         | >1595        |
| Du156.12              | 0.47                               | 0.51       | 52.0        | 1.3         | 86.1         |
| Du172.17              | >1595                              | 337.88     | >1595       | 1.8         | 1369.9       |
| Du422.1               | 8.85                               | 7.72       | >1595       | 4.4         | >1595        |
| ZM53M.PB12            | 0.06                               | 2.28       | 60.5        | 11.1        | 5.3          |
| ZM109F.PB4            | 35.09                              | >1595      | >1595       | 3.4         | >1595        |
| ZM135M.PL10A          | >1595                              | >1595      | 1.8         | 2.2         | >1595        |
| ZM197M.PB7            | 0.32                               | >1595      | 17.5        | 1.0         | 1369.9       |
| ZM214M.PL15           | 16.08                              | 1.51       | 6.2         | 4.6         | 34.5         |
| ZM233M.PB6            | 0.99                               | 588.24     | 108.2       | 3.4         | 85.1         |
| ZM249M.PL1            | 16.08                              | 11.68      | 2.3         | 13.7        | 285.8        |
| CAP8.6F               | 257.00                             | 0.34       | >1595       | 6.0         | 100.7        |
| CAP45.2.00.G3         | 3.39                               | 1211.07    | >1595       | 3.6         | 804.7        |
| CAP61.4.22.F10A       | 144.00                             | 0.67       | 93.1        | 10.7        | 458.3        |
| CAP63.A9              | 4.90                               | 5.32       | 21.1        | 17.5        | >1595        |
| CAP84.32              | 293.00                             | 0.14       | 562.0       | 11.5        | >1595        |
| CAP85.9               | >1595                              | 1.83       | 597.1       | 2.9         | 1207.1       |
| CAP88.B5              | >1595                              | 153.33     | 998.9       | 0.3         | 176.9        |
| CAP206.8              | 4.51                               | 692.04     | >1595       | 2.7         | >1595        |
| CAP210.2.00.E8        | 0.11                               | >1595      | 14.5        | 11.9        | >1595        |
| CAP228.51             | 24.93                              | >1595      | >1595       | 1370.0      | >1595        |
| CAP239.2.00.G3J       | 2.91                               | 0.77       | >1595       | 3.2         | >1595        |
| CAP244.D3             | >1595                              | >1595      | 70.2        | 9.2         | 193.7        |
| CAP255.2.00.16J       | >1595                              | 0.35       | 35.1        | 13.6        | 862.2        |
| CAP256.SU             | 0.08                               | 0.64       | 14.5        | 23.1        | 9.4          |
| ConC                  | 0.17                               | 0.56       | 70.8        | 5.9         | 37.4         |
| <b>Geometric mean</b> | <b>6.5</b>                         | <b>4.0</b> | <b>13.6</b> | <b>7.2</b>  | <b>101.3</b> |
| <b>Breadth</b>        | <b>62%</b>                         | <b>71%</b> | <b>78%</b>  | <b>100%</b> | <b>69%</b>   |

**B**

| Pseudovirus           | single scFv IC <sub>80</sub> in nM |            |             |             |              |
|-----------------------|------------------------------------|------------|-------------|-------------|--------------|
|                       | CAP256.25                          | PGT121     | 3BNC117     | 10E8v4      | 8ANC195      |
| Q23.17                | 350.00                             | 0.50       | 5.1         | 52.9        | 593.1        |
| Q168.A2               | >1595                              | >1595      | 3.4         | 52.0        | 89.9         |
| Q259.D2.17            | 1000.00                            | >1595      | >1595       | 108.4       | >1595        |
| Q461.E2               | 223.81                             | >1595      | 6.3         | 71.4        | >1595        |
| Q769.D22              | >1595                              | >1595      | 1.4         | 46.5        | 86.5         |
| Q842.D12              | 1218.50                            | 13.03      | 1.1         | 68.7        | >1595        |
| BG505.W6M 332N        | 67.54                              | 1.16       | 1.6         | 14.8        | 45.1         |
| CAAN5342.A2           | >1595                              | 36.23      | 63.5        | 160.0       | >1595        |
| AC10.0.29             | >1595                              | 8.24       | >1595       | 13.0        | >1595        |
| RHPA4259.7            | >1595                              | 2.36       | 2.1         | 39.5        | 36.1         |
| TRO.11                | >1595                              | 7.33       | 6.2         | 37.8        | 29.9         |
| PVO.4                 | 324.90                             | 24.22      | 4.7         | 87.2        | 326.1        |
| SC422661.8            | >1595                              | 536.41     | 9.9         | 10.1        | >1595        |
| REJO.67               | >1595                              | >1595      | 42.8        | 16.5        | 308.9        |
| TRJO4551.18           | >1595                              | >1595      | 346.1       | 46.2        | >1595        |
| WITO.33               | >1595                              | >1595      | 3.1         | 17.3        | >1595        |
| THRO4156.18           | >1595                              | >1595      | 214.3       | 12.9        | >1595        |
| QH0692.42             | >1595                              | >1595      | 9.9         | 48.5        | >1595        |
| 6535.3                | >1595                              | 0.41       | 327.0       | 19.2        | 103.8        |
| Du151.2               | 51.53                              | 0.99       | >1595       | 27.0        | >1595        |
| Du156.12              | 4.58                               | 1.10       | 281.3       | 6.6         | 346.5        |
| Du172.17              | >1595                              | >1595      | >1595       | 14.5        | >1595        |
| Du422.1               | 487.75                             | 137.41     | >1595       | 14.6        | >1595        |
| ZM53M.PB12            | 0.43                               | 148.92     | 378.9       | 68.9        | 28.0         |
| ZM109F.PB4            | >1595                              | >1595      | >1595       | 23.8        | >1595        |
| ZM135M.PL10A          | >1595                              | >1595      | 6.2         | 11.0        | >1595        |
| ZM197M.PB7            | 3.19                               | >1595      | 64.8        | 5.2         | >1595        |
| ZM214M.PL15           | 716.09                             | 20.28      | 73.0        | 52.6        | >1595        |
| ZM233M.PB6            | 22.54                              | >1595      | 490.1       | 15.4        | 878.5        |
| ZM249M.PL1            | 1594.90                            | 732.15     | 16.0        | 80.3        | 1000.0       |
| CAP8.6F               | >1595                              | 2.00       | >1595       | 22.3        | 364.3        |
| CAP45.2.00.G3         | 683.66                             | >1595      | >1595       | 11.9        | >1595        |
| CAP61.4.22.F10A       | 978.48                             | 3.60       | 251.6       | 60.1        | >1595        |
| CAP63.A9              | 133.98                             | 26.57      | 113.8       | 70.8        | >1595        |
| CAP84.32              | >1595                              | 0.41       | 1622.6      | 34.6        | >1595        |
| CAP85.9               | >1595                              | 6.15       | >1595       | 16.3        | >1595        |
| CAP88.B5              | >1595                              | >1595      | >1595       | 1.4         | 481.9        |
| CAP206.8              | 69.47                              | >1595      | >1595       | 11.0        | >1595        |
| CAP210.2.00.E8        | 0.49                               | >1595      | >1595       | 68.1        | >1595        |
| CAP228.51             | >1595                              | >1595      | >1595       | >1595       | >1595        |
| CAP239.2.00.G3J       | 34.16                              | 5.88       | >1595       | 16.8        | >1595        |
| CAP244.D3             | >1595                              | >1595      | 340.9       | 39.4        | 536.5        |
| CAP255.2.00.16J       | >1595                              | 0.98       | 242.6       | 66.5        | >1595        |
| CAP256.SU             | 0.45                               | 2.11       | 56.7        | 86.5        | 31.5         |
| ConC                  | 1.61                               | 1.63       | 233.2       | 19.2        | 252.6        |
| <b>Geometric mean</b> | <b>58.0</b>                        | <b>6.8</b> | <b>34.4</b> | <b>28.0</b> | <b>170.6</b> |
| <b>Breadth</b>        | <b>49%</b>                         | <b>56%</b> | <b>69%</b>  | <b>98%</b>  | <b>40%</b>   |

C

| Pseudovirus           | single scFv IC <sub>50</sub> in µg/mL |             |             |             |             |
|-----------------------|---------------------------------------|-------------|-------------|-------------|-------------|
|                       | CAP256.25                             | PGT121      | 3BNC117     | 10E8v4      | 8ANC195     |
| Q23.17                | 0.30                                  | 0.0054      | 0.042       | 0.42        | 7.2         |
| Q168.A2               | 1.1                                   | >50         | 0.030       | 0.51        | 0.67        |
| Q259.D2.17            | 0.70                                  | 1.00        | >50         | 1.0         | >50         |
| Q461.E2               | 0.90                                  | >50         | 0.050       | 0.51        | 8.0         |
| Q769.D22              | >50                                   | >50         | 0.014       | 0.16        | 0.33        |
| Q842.D12              | 3.7                                   | 0.058       | 0.012       | 0.54        | 31          |
| BG505.W6M 332N        | 0.14                                  | 0.016       | 0.016       | 0.098       | 0.26        |
| CAAN5342.A2           | >50                                   | 0.066       | 0.65        | 0.86        | >50         |
| AC10.0.29             | 7.3                                   | 0.042       | >50         | 0.10        | 1.8         |
| RHPA4259.7            | >50                                   | 0.013       | 0.016       | 0.35        | 0.25        |
| TRO.11                | >50                                   | 0.064       | 0.047       | 0.26        | 0.20        |
| PVO.4                 | 0.83                                  | 0.15        | 0.044       | 0.65        | 1.9         |
| SC422661.8            | >50                                   | 3.0         | 0.099       | 0.050       | 3.4         |
| REJO.67               | >50                                   | >50         | 0.27        | 0.13        | 1.1         |
| TRJO4551.18           | >50                                   | 24          | 2.6         | 0.39        | 14          |
| WITO.33               | >50                                   | >50         | 0.025       | 0.13        | >50         |
| THRO4156.18           | >50                                   | >50         | 2.0         | 0.12        | >50         |
| QH0692.42             | >50                                   | >50         | 0.10        | 0.35        | 6.8         |
| 6535.3                | >50                                   | 0.0035      | 5.4         | 0.16        | 0.56        |
| Du151.2               | 0.034                                 | 0.0049      | 30          | 0.26        | >50         |
| Du156.12              | 0.015                                 | 0.015       | 1.5         | 0.039       | 2.5         |
| Du172.17              | >50                                   | 9.8         | >50         | 0.052       | 40          |
| Du422.1               | 0.28                                  | 0.22        | >50         | 0.13        | >50         |
| ZM53M.PB12            | 0.0020                                | 0.066       | 1.7         | 0.33        | 0.15        |
| ZM109F.PB4            | 1.1                                   | >50         | >50         | 0.098       | >50         |
| ZM135M.PL10A          | >50                                   | >50         | 0.050       | 0.063       | >50         |
| ZM197M.PB7            | 0.0100                                | >50         | 0.50        | 0.029       | 40          |
| ZM214M.PL15           | 0.50                                  | 0.043       | 0.18        | 0.14        | 1.00        |
| ZM233M.PB6            | 0.031                                 | 17          | 3.1         | 0.100       | 2.5         |
| ZM249M.PL1            | 0.50                                  | 0.34        | 0.065       | 0.40        | 8.3         |
| CAP8.6F               | 8.1                                   | 0.0098      | >50         | 0.18        | 2.9         |
| CAP45.2.00.G3         | 0.11                                  | 35          | >50         | 0.10        | 23          |
| CAP61.4.22.F10A       | 4.5                                   | 0.019       | 2.7         | 0.31        | 13          |
| CAP63.A9              | 0.15                                  | 0.15        | 0.60        | 0.51        | >50         |
| CAP84.32              | 9.2                                   | 0.0040      | 16          | 0.34        | >50         |
| CAP85.9               | >50                                   | 0.053       | 17          | 0.085       | 35          |
| CAP88.B5              | >50                                   | 4.4         | 28          | 0.0098      | 5.1         |
| CAP206.8              | 0.14                                  | 20          | >50         | 0.078       | >50         |
| CAP210.2.00.E8        | 0.0034                                | >50         | 0.41        | 0.35        | >50         |
| CAP228.51             | 0.78                                  | >50         | >50         | 40          | >50         |
| CAP239.2.00.G3J       | 0.091                                 | 0.022       | >50         | 0.095       | >50         |
| CAP244.D3             | >50                                   | >50         | 2.0         | 0.27        | 5.6         |
| CAP255.2.00.16J       | >50                                   | 0.0100      | 1.0         | 0.40        | 25          |
| CAP256.SU             | 0.0024                                | 0.018       | 0.41        | 0.68        | 0.27        |
| ConC                  | 0.0054                                | 0.016       | 2.0         | 0.17        | 1.1         |
| <b>Geometric mean</b> | <b>0.20</b>                           | <b>0.12</b> | <b>0.39</b> | <b>0.21</b> | <b>2.94</b> |
| <b>Breadth</b>        | <b>62%</b>                            | <b>71%</b>  | <b>78%</b>  | <b>100%</b> | <b>69%</b>  |

D

| Pseudovirus           | single scFv IC <sub>80</sub> in µg/mL |             |            |             |            |
|-----------------------|---------------------------------------|-------------|------------|-------------|------------|
|                       | CAP256.25                             | PGT121      | 3BNC117    | 10E8v4      | 8ANC195    |
| Q23.17                | 11                                    | 0.014       | 0.15       | 1.5         | 17         |
| Q168.A2               | >50                                   | >50         | 0.097      | 1.5         | 2.6        |
| Q259.D2.17            | 31                                    | >50         | >50        | 3.2         | >50        |
| Q461.E2               | 7.0                                   | >50         | 0.18       | 2.1         | >50        |
| Q769.D22              | >50                                   | >50         | 0.041      | 1.4         | 2.5        |
| Q842.D12              | 38                                    | 0.38        | 0.032      | 2.0         | >50        |
| BG505.W6M 332N        | 2.1                                   | 0.034       | 0.047      | 0.43        | 1.3        |
| CAAN5342.A2           | >50                                   | 1.0         | 1.8        | 4.7         | >50        |
| AC10.0.29             | >50                                   | 0.24        | >50        | 0.38        | >50        |
| RHPA4259.7            | >50                                   | 0.068       | 0.060      | 1.2         | 1.0        |
| TRO.11                | >50                                   | 0.21        | 0.18       | 1.1         | 0.87       |
| PVO.4                 | 10                                    | 0.70        | 0.13       | 2.6         | 9.5        |
| SC422661.8            | >50                                   | 15          | 0.28       | 0.30        | >50        |
| REJO.67               | >50                                   | >50         | 1.2        | 0.48        | 9.0        |
| TRJO4551.18           | >50                                   | >50         | 9.9        | 1.4         | >50        |
| WITO.33               | >50                                   | >50         | 0.088      | 0.51        | >50        |
| THRO4156.18           | >50                                   | >50         | 6.1        | 0.38        | >50        |
| QH0692.42             | >50                                   | >50         | 0.28       | 1.4         | >50        |
| 6535.3                | >50                                   | 0.012       | 9.3        | 0.56        | 3.0        |
| Du151.2               | 1.6                                   | 0.028       | >50        | 0.79        | >50        |
| Du156.12              | 0.14                                  | 0.032       | 8.0        | 0.19        | 10         |
| Du172.17              | >50                                   | >50         | >50        | 0.42        | >50        |
| Du422.1               | 15                                    | 4.0         | >50        | 0.43        | >50        |
| ZM53M.PB12            | 0.013                                 | 4.3         | 11         | 2.0         | 0.81       |
| ZM109F.PB4            | >50                                   | >50         | >50        | 0.70        | >50        |
| ZM135M.PL10A          | >50                                   | >50         | 0.18       | 0.32        | >50        |
| ZM197M.PB7            | 0.100                                 | >50         | 1.8        | 0.15        | >50        |
| ZM214M.PL15           | 22                                    | 0.59        | 2.1        | 1.5         | >50        |
| ZM233M.PB6            | 0.71                                  | >50         | 14         | 0.45        | 25         |
| ZM249M.PL1            | 50                                    | 21          | 0.45       | 2.4         | 29         |
| CAP8.6F               | >50                                   | 0.058       | >50        | 0.65        | 11         |
| CAP45.2.00.G3         | 21                                    | >50         | >50        | 0.35        | >50        |
| CAP61.4.22.F10A       | 31                                    | 0.10        | 7.2        | 1.8         | >50        |
| CAP63.A9              | 4.2                                   | 0.77        | 3.2        | 2.1         | >50        |
| CAP84.32              | >50                                   | 0.012       | 46         | 1.0         | >50        |
| CAP85.9               | >50                                   | 0.18        | >50        | 0.48        | >50        |
| CAP88.B5              | >50                                   | >50         | >50        | 0.040       | 14         |
| CAP206.8              | 2.2                                   | >50         | >50        | 0.32        | >50        |
| CAP210.2.00.E8        | 0.015                                 | >50         | >50        | 2.0         | >50        |
| CAP228.51             | >50                                   | >50         | >50        | >50         | >50        |
| CAP239.2.00.G3J       | 1.1                                   | 0.17        | >50        | 0.49        | >50        |
| CAP244.D3             | >50                                   | >50         | 9.7        | 1.2         | 16         |
| CAP255.2.00.16J       | >50                                   | 0.028       | 6.9        | 1.9         | >50        |
| CAP256.SU             | 0.014                                 | 0.061       | 1.6        | 2.5         | 0.91       |
| ConC                  | 0.050                                 | 0.047       | 6.6        | 0.56        | 7.3        |
| <b>Geometric mean</b> | <b>1.8</b>                            | <b>0.20</b> | <b>1.0</b> | <b>0.82</b> | <b>4.9</b> |
| <b>Breadth</b>        | <b>49%</b>                            | <b>56%</b>  | <b>69%</b> | <b>98%</b>  | <b>40%</b> |



D

| Pseudovirus     | Experimental IC <sub>50</sub> titres in µg/mL |        |         |        |         |                      |                       |                      |                       |                    |                   |                    |                     |                    |                    |                                 |                                  |                                  |                               |                               |                                |                                  |                                  |                                   |                                |
|-----------------|-----------------------------------------------|--------|---------|--------|---------|----------------------|-----------------------|----------------------|-----------------------|--------------------|-------------------|--------------------|---------------------|--------------------|--------------------|---------------------------------|----------------------------------|----------------------------------|-------------------------------|-------------------------------|--------------------------------|----------------------------------|----------------------------------|-----------------------------------|--------------------------------|
|                 | single scFv                                   |        |         |        |         | 2 scFv combinations  |                       |                      |                       |                    |                   |                    |                     |                    |                    | 3 scFv combinations             |                                  |                                  |                               |                               |                                |                                  |                                  |                                   |                                |
|                 | CAP256.25                                     | PGT121 | 3BNC117 | 10E8v4 | 8ANC195 | CAP256.25<br>+PGT121 | CAP256.25<br>+3BNC117 | CAP256.25<br>+10E8v4 | CAP256.25<br>+8ANC195 | PGT121<br>+3BNC117 | PGT121<br>+10E8v4 | PGT121<br>+8ANC195 | 3BNC117<br>+8ANC195 | 3BNC117<br>+10E8v4 | 10E8v4<br>+8ANC195 | CAP256.25<br>+PGT121<br>+10E8v4 | CAP256.25<br>+3BNC117<br>+10E8v4 | CAP256.25<br>+10E8v4<br>+8ANC195 | PGT121<br>+3BNC117<br>+10E8v4 | PGT121<br>+10E8v4<br>+8ANC195 | 3BNC117<br>+10E8v4<br>+8ANC195 | CAP256.25<br>+3BNC117<br>+PGT121 | CAP256.25<br>+PGT121<br>+8ANC195 | CAP256.25<br>+3BNC117<br>+8ANC195 | 3BNC117<br>+PGT121<br>+8ANC195 |
| Q23.17          | 11                                            | 0.014  | 0.15    | 1.5    | 17      | 0.020                | 0.15                  | 0.36                 | 7.4                   | 0.017              | 0.025             | 0.022              | 0.16                | 0.11               | 1.4                | 0.009                           | 0.075                            | 0.45                             | 0.010                         | 0.010                         | 0.11                           | 0.008                            | 0.009                            | 0.079                             | 0.010                          |
| Q168.A2         | >30                                           | >30    | 0.097   | 1.5    | 2.6     | >30                  | 0.082                 | 0.53                 | 1.6                   | 0.089              | 1.7               | 3.3                | 0.084               | 0.079              | 0.59               | 0.70                            | 0.049                            | 0.28                             | 0.065                         | 0.44                          | 0.074                          | 0.081                            | 1.0                              | 0.058                             | 0.082                          |
| Q842.D12        | >30                                           | 0.38   | 0.032   | 2.0    | >30     | 0.27                 | 0.027                 | 1.7                  | 17                    | 0.016              | 0.11              | 0.21               | 0.025               | 0.020              | 2.0                | 0.20                            | 0.022                            | 1.1                              | 0.016                         | 0.14                          | 0.025                          | 0.019                            | 0.27                             | 0.022                             | 0.017                          |
| AC10.0.29       | >30                                           | 0.24   | >30     | 0.38   | >30     | 0.17                 | >30                   | 0.31                 | 11                    | 0.18               | 0.096             | 0.24               | 29                  | 0.36               | 0.30               | 0.080                           | 0.29                             | 0.24                             | 0.073                         | 0.068                         | 0.30                           | 0.18                             | 0.21                             | 8.3                               | 0.15                           |
| RHPA4259.7      | >30                                           | 0.068  | 0.060   | 1.2    | 1.0     | 0.14                 | 0.053                 | 0.92                 | 1.0                   | 0.035              | 0.081             | 0.082              | 0.066               | 0.064              | 0.41               | 0.059                           | 0.034                            | 0.32                             | 0.019                         | 0.032                         | 0.040                          | 0.018                            | 0.041                            | 0.045                             | 0.023                          |
| PVO.4           | 10                                            | 0.70   | 0.13    | 2.6    | 9.5     | 0.61                 | 0.12                  | 0.88                 | 1.4                   | 0.088              | 0.37              | 0.42               | 0.14                | 0.12               | 0.93               | 0.36                            | 0.085                            | 0.49                             | 0.080                         | 0.24                          | 0.11                           | 0.085                            | 0.47                             | 0.13                              | 0.10                           |
| 6535.3          | >30                                           | 0.012  | 9.3     | 0.56   | 3.0     | 0.012                | 30                    | 0.39                 | 1.8                   | 0.011              | 0.011             | 0.015              | 1.8                 | 0.40               | 0.23               | 0.008                           | 0.45                             | 0.38                             | 0.014                         | 0.008                         | 0.26                           | 0.009                            | 0.008                            | 1.9                               | 0.014                          |
| Du155.12        | 0.14                                          | 0.032  | 8.0     | 0.19   | 10      | 0.019                | 0.11                  | 0.044                | 0.16                  | 0.036              | 0.023             | 0.042              | 2.2                 | 0.19               | 0.18               | 0.013                           | 0.052                            | 0.955                            | 0.020                         | 0.013                         | 0.29                           | 0.012                            | 0.011                            | 0.22                              | 0.025                          |
| ZME3M.PB12      | 0.013                                         | 4.3    | 11      | 2.0    | 0.81    | 0.016                | 0.017                 | 0.016                | 0.016                 | 0.79               | 0.17              | 1.2                | 0.58                | 0.94               | 0.30               | 0.009                           | 0.010                            | 0.009                            | 0.20                          | 0.11                          | 0.34                           | 0.007                            | 0.006                            | 0.012                             | 0.28                           |
| ZM233M.PB6      | 0.71                                          | >30    | 14      | 0.45   | 25      | 0.86                 | 0.54                  | 0.083                | 0.64                  | 9.7                | 0.38              | >30                | 7.2                 | 0.74               | 0.42               | 0.13                            | 0.13                             | 0.090                            | 0.50                          | 0.41                          | 0.41                           | 1.4                              | 2.3                              | 0.85                              | 2.7                            |
| ZM249M.PL1      | >30                                           | 21     | 0.45    | 2.4    | 29      | 5.9                  | 0.30                  | 0.65                 | 10                    | 0.75               | 0.73              | 5.0                | 0.41                | 0.29               | 1.9                | 0.62                            | 0.16                             | 0.60                             | 0.26                          | 1.0                           | 0.36                           | 0.35                             | 2.7                              | 0.46                              | 0.76                           |
| CAP8.6F         | >30                                           | 0.058  | >30     | 0.65   | 11      | 0.036                | >30                   | 0.37                 | 9.1                   | 0.046              | 0.028             | 0.037              | 12                  | 0.95               | 0.47               | 0.024                           | 0.56                             | 0.27                             | 0.037                         | 0.018                         | 0.48                           | 0.042                            | 0.030                            | 7.7                               | 0.057                          |
| CAP61.4.22.F10A | 31                                            | 0.10   | 7.2     | 1.8    | >30     | 0.053                | 4.7                   | 0.65                 | 12                    | 0.069              | 0.038             | 0.052              | 8.4                 | 1.1                | 1.2                | 0.037                           | 0.72                             | 0.53                             | 0.047                         | 0.026                         | 1.1                            | 0.061                            | 0.046                            | 5.2                               | 0.061                          |
| CAP84.32        | >30                                           | 0.012  | >30     | 1.0    | >30     | 0.016                | >30                   | 0.65                 | >30                   | 0.014              | 0.010             | 0.014              | 29                  | 1.2                | 1.4                | 0.012                           | 0.87                             | 0.83                             | 0.010                         | 0.011                         | 0.60                           | 0.010                            | 0.009                            | 14                                | 0.032                          |
| CAP88.B5        | >30                                           | >30    | >30     | 0.040  | 14      | >30                  | >30                   | 0.027                | 30                    | 12                 | 0.017             | 9.5                | 18                  | 0.023              | 0.035              | 0.025                           | 0.013                            | 0.012                            | 0.026                         | 0.017                         | 0.019                          | 13                               | 3.1                              | 13                                | 6.6                            |
| CAP256.SU       | 0.014                                         | 0.061  | 1.6     | 2.5    | 0.91    | 0.010                | 0.015                 | 0.014                | 0.014                 | 0.057              | 0.047             | 0.064              | 0.73                | 0.63               | 0.87               | 0.008                           | 0.011                            | 0.010                            | 0.045                         | 0.037                         | 0.29                           | 0.012                            | 0.006                            | 0.013                             | 0.060                          |
| ConC            | 0.050                                         | 0.047  | 6.6     | 0.56   | 7.3     | 0.013                | 0.097                 | 0.044                | 0.11                  | 0.026              | 0.018             | 0.031              | 3.3                 | 0.29               | 0.27               | 0.009                           | 0.028                            | 0.027                            | 0.022                         | 0.022                         | 0.21                           | 0.009                            | 0.008                            | 0.077                             | 0.027                          |
| Geometric mean  | 0.49                                          | 0.13   | 1.0     | 0.86   | 5.8     | 0.071                | 0.17                  | 0.21                 | 1.5                   | 0.11               | 0.070             | 0.16               | 1.3                 | 0.24               | 0.55               | 0.041                           | 0.084                            | 0.16                             | 0.042                         | 0.051                         | 0.19                           | 0.049                            | 0.074                            | 0.38                              | 0.088                          |

Supplementary 3: Breadth and Potency of single scFv against a 45 virus panel

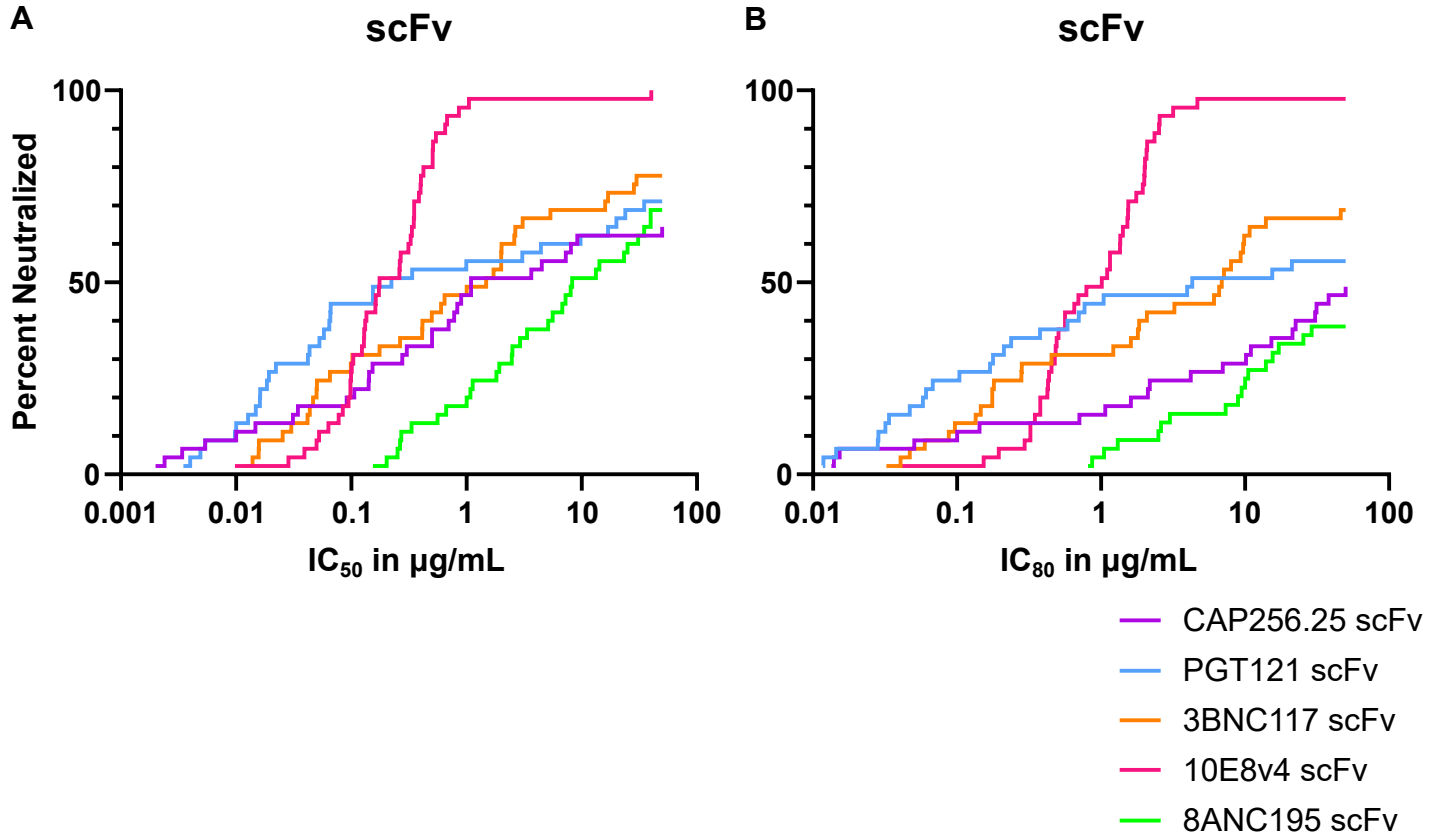











Supplementary Figure 5. Active coverage by scFv of a 45 virus panel

| IC <sub>80</sub> of scFv |                          |         |         |  |                          |         |         |
|--------------------------|--------------------------|---------|---------|--|--------------------------|---------|---------|
|                          | active coverage ≥ 1 scFv |         |         |  | active coverage ≥ 2 scFv |         |         |
|                          | 1µg/mL                   | 10µg/mL | 50µg/mL |  | 1µg/mL                   | 10µg/mL | 50µg/mL |
| CAP256.25 +8ANC195       | 20%                      | 58%     | 80%     |  | 4%                       | 9%      | 20%     |
| 3BNC117 +8ANC195         | 40%                      | 67%     | 80%     |  | 2%                       | 22%     | 36%     |
| PGT121 +8ANC195          | 47%                      | 67%     | 82%     |  | 4%                       | 18%     | 27%     |
| CAP256.25 +3BNC117       | 51%                      | 71%     | 89%     |  | 0%                       | 16%     | 33%     |
| CAP256.25 +PGT121        | 58%                      | 69%     | 82%     |  | 7%                       | 18%     | 33%     |
| 10E8v4+ 8ANC195          | 64%                      | 98%     | 98%     |  | 0%                       | 24%     | 40%     |
| 3BNC117 +PGT121          | 67%                      | 82%     | 91%     |  | 13%                      | 33%     | 40%     |
| CAP256.25 +10E8v4        | 73%                      | 98%     | 100%    |  | 9%                       | 29%     | 49%     |
| PGT121 +10E8v4           | 80%                      | 98%     | 98%     |  | 20%                      | 51%     | 56%     |
| 3BNC117 +10E8v4          | 93%                      | 98%     | 98%     |  | 9%                       | 62%     | 67%     |

|                             | active coverage ≥ 1 scFv |         |         |  | active coverage ≥ 2 scFv |         |         |
|-----------------------------|--------------------------|---------|---------|--|--------------------------|---------|---------|
|                             | 1µg/mL                   | 10µg/mL | 50µg/mL |  | 1µg/mL                   | 10µg/mL | 50µg/mL |
| CAP256.25 +3BNC117 +8ANC195 | 53%                      | 82%     | 98%     |  | 7%                       | 33%     | 49%     |
| CAP256.25 +PGT121 +8ANC195  | 58%                      | 80%     | 93%     |  | 11%                      | 27%     | 44%     |
| 3BNC117 +PGT121 +8ANC195    | 69%                      | 84%     | 93%     |  | 16%                      | 42%     | 53%     |
| CAP256.25 +3BNC117 +PGT121  | 76%                      | 89%     | 100%    |  | 20%                      | 44%     | 53%     |
| CAP256.25 +10E8v4 +8ANC195  | 82%                      | 98%     | 100%    |  | 13%                      | 44%     | 69%     |
| PGT121 +10E8v4 +8ANC195     | 84%                      | 98%     | 98%     |  | 24%                      | 58%     | 69%     |
| CAP256.25 +PGT121 +10E8v4   | 89%                      | 98%     | 100%    |  | 27%                      | 62%     | 71%     |
| 3BNC117+ 10E8v4+ 8ANC195    | 93%                      | 98%     | 98%     |  | 11%                      | 64%     | 71%     |
| CAP256.25 +3BNC117 +10E8v4  | 96%                      | 98%     | 100%    |  | 18%                      | 76%     | 82%     |
| 3BNC117 +PGT121 +10E8v4     | 96%                      | 98%     | 98%     |  | 38%                      | 80%     | 82%     |

|                                     | active coverage ≥ 1 scFv |         |         |  | active coverage ≥ 2 scFv |         |         |
|-------------------------------------|--------------------------|---------|---------|--|--------------------------|---------|---------|
|                                     | 1µg/mL                   | 10µg/mL | 50µg/mL |  | 1µg/mL                   | 10µg/mL | 50µg/mL |
| CAP256.25 +3BNC117 +PGT121 +10E8v4  | 98%                      | 98%     | 100%    |  | 44%                      | 87%     | 91%     |
| 3BNC117 +PGT121 +10E8v4 +8ANC195    | 96%                      | 98%     | 98%     |  | 40%                      | 80%     | 84%     |
| CAP256.25 +3BNC117 +10E8v4 +8ANC195 | 96%                      | 98%     | 100%    |  | 24%                      | 76%     | 87%     |
| CAP256.25 +PGT121 +10E8v4 +8ANC195  | 91%                      | 98%     | 100%    |  | 31%                      | 69%     | 82%     |
| CAP256.25 +3BNC117 +PGT121 +8ANC195 | 78%                      | 93%     | 100%    |  | 22%                      | 51%     | 64%     |



B

Active coverage by IgG of a 45 virus panel

|                             |         | IgG IC <sub>80</sub> , Bliss Hill model |                   |                      |                    |                    |                       |                      |                    |                       |                     |
|-----------------------------|---------|-----------------------------------------|-------------------|----------------------|--------------------|--------------------|-----------------------|----------------------|--------------------|-----------------------|---------------------|
|                             |         | 3BNC117<br>+10E8v4                      | PGT121<br>+10E8v4 | CAP256.25<br>+10E8v4 | 10E8v4<br>+8ANC195 | PGT121<br>+3BNC117 | CAP256.25<br>+3BNC117 | CAP256.25<br>+PGT121 | PGT121<br>+8ANC195 | CAP256.25<br>+8ANC195 | 3BNC117<br>+8ANC195 |
| active coverage<br>≥ 1 scFv | 50µg/mL | 100%                                    | 100%              | 100%                 | 100%               | 100%               | 100%                  | 96%                  | 98%                | 93%                   | 91%                 |
|                             | 10µg/mL | 100%                                    | 96%               | 93%                  | 89%                | 98%                | 100%                  | 89%                  | 84%                | 73%                   | 89%                 |
|                             | 1µg/mL  | 78%                                     | 78%               | 64%                  | 33%                | 89%                | 84%                   | 76%                  | 58%                | 49%                   | 69%                 |
| active coverage<br>≥ 2 scFv | 50µg/mL | 82%                                     | 78%               | 60%                  | 47%                | 64%                | 47%                   | 49%                  | 36%                | 24%                   | 42%                 |
|                             | 10µg/mL | 64%                                     | 58%               | 44%                  | 29%                | 56%                | 40%                   | 38%                  | 22%                | 18%                   | 31%                 |
|                             | 1µg/mL  | 4%                                      | 7%                | 7%                   | 0%                 | 33%                | 27%                   | 24%                  | 4%                 | 2%                    | 2%                  |

  

|                             |         | PGT121<br>+3BNC117<br>+10E8v4 | CAP256.25<br>+3BNC117<br>+10E8v4 | 3BNC117<br>+10E8v4<br>+8ANC195 | PGT121<br>+10E8v4<br>+8ANC195 | CAP256.25<br>+10E8v4<br>+8ANC195 | CAP256.25<br>+PGT121<br>+10E8v4 | PGT121<br>+3BNC117<br>+8ANC195 | CAP256.25<br>+PGT121<br>+3BNC117 | CAP256.25<br>+3BNC117<br>+8ANC195 | CAP256.25<br>+PGT121<br>+8ANC195 |
|-----------------------------|---------|-------------------------------|----------------------------------|--------------------------------|-------------------------------|----------------------------------|---------------------------------|--------------------------------|----------------------------------|-----------------------------------|----------------------------------|
| active coverage<br>≥ 1 scFv | 50µg/mL | 100%                          | 100%                             | 100%                           | 100%                          | 100%                             | 100%                            | 100%                           | 100%                             | 100%                              | 98%                              |
|                             | 10µg/mL | 100%                          | 100%                             | 100%                           | 96%                           | 96%                              | 100%                            | 98%                            | 100%                             | 100%                              | 96%                              |
|                             | 1µg/mL  | 96%                           | 96%                              | 84%                            | 82%                           | 76%                              | 89%                             | 89%                            | 98%                              | 87%                               | 78%                              |
| active coverage<br>≥ 2 scFv | 50µg/mL | 96%                           | 100%                             | 87%                            | 89%                           | 82%                              | 89%                             | 80%                            | 89%                              | 73%                               | 69%                              |
|                             | 10µg/mL | 89%                           | 91%                              | 71%                            | 69%                           | 60%                              | 82%                             | 69%                            | 80%                              | 58%                               | 51%                              |
|                             | 1µg/mL  | 36%                           | 33%                              | 7%                             | 11%                           | 9%                               | 33%                             | 36%                            | 53%                              | 27%                               | 27%                              |
